# Supplementary material for: New pyridine-2,4,6-tricarboxylato coordination polymers: Synthesis, crystal structures and properties
Source: Royal Society of Chemistry journal article supplement (doi:10.1039/c0ce00365d), 2011-01-01
Supplement: c0ce00365d.pdf [file c0ce00365d.pdf]

## Supporting information

### Scheme S1

**Figure S1.** I.R. spectra of (a) **1**, (b) **2** and (c) **3**.

**Figure S2.** DTA-TG curves for (a) **1**, (b) **2** and (c) **3**.

**Figure S3 (a)** Assembly of crystal structures from the transition metal-ptc compounds and **1**;  
**(b)** The evolving of crystal structures for the transition metal-ptc compounds; **(c)** The metal oxide unit in the transition metal hydroxo ptc complexes.

**Scheme S1**

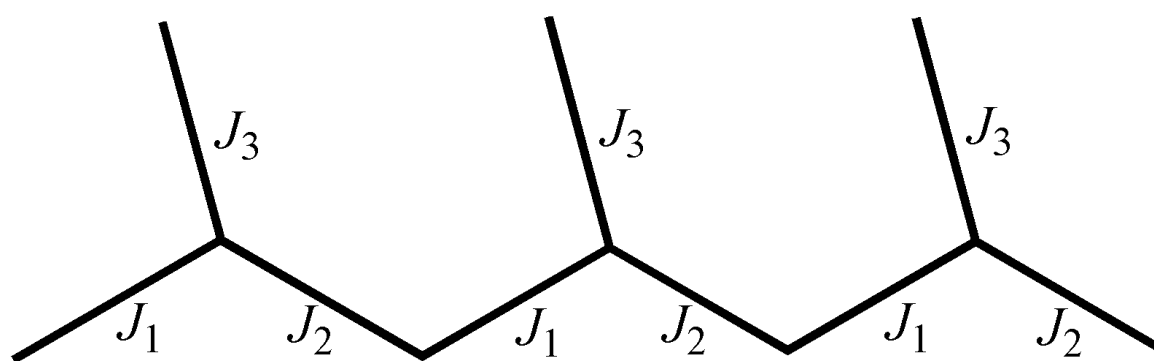

**Table S1a.** Selected Interatomic Distances (Å) and Bond Angles (deg) for **1<sup>a</sup>**

|                                          |          |             |          |                           |          |
|------------------------------------------|----------|-------------|----------|---------------------------|----------|
| Mn1–O1                                   | 2.291(3) | Mn2–O2      | 2.140(3) | Mn3–O3                    | 2.123(3) |
| Mn1–O6                                   | 2.258(3) | Mn2–O7      | 2.331(3) | Mn3–O5 <sup>#1</sup>      | 2.188(3) |
| Mn1–O11 <sup>#2</sup>                    | 2.229(3) | Mn2–O12     | 2.474(4) | Mn3–O18                   | 2.204(3) |
| Mn1–O12 <sup>#2</sup>                    | 2.458(3) | Mn2–O15     | 2.226(3) | Mn3–O19                   | 2.140(3) |
| Mn1–O13                                  | 2.215(3) | Mn2–O16     | 2.369(4) | Mn3–O20                   | 2.195(3) |
| Mn1–O14                                  | 2.208(3) | Mn2–O17     | 2.143(3) | Mn3–O21                   | 2.194(3) |
| Mn1–N1                                   | 2.214(3) | Mn2–N2      | 2.299(3) |                           |          |
| O1–Mn1–O6                                | 144.4(1) | O13–Mn1–N1  | 99.2(1)  | O15–Mn2–N2                | 91.6(1)  |
| O1–Mn1–O11 <sup>#2</sup>                 | 77.5(1)  | O14–Mn1–N1  | 91.8(1)  | O16–Mn2–O17               | 106.2(1) |
| O1–Mn1–O12 <sup>#2</sup>                 | 132.9(1) | O2–Mn2–O7   | 94.2(1)  | O16–Mn2–N2                | 118.6(1) |
| O1–Mn1–O13                               | 99.1(1)  | O2–Mn2–O12  | 128.3(1) | O17–Mn2–N2                | 98.1(1)  |
| O1–Mn1–O14                               | 91.2(1)  | O2–Mn2–O15  | 88.3(1)  | O3–Mn3–O5 <sup>#1</sup>   | 164.5(1) |
| O1–Mn1–N1                                | 70.4(1)  | O2–Mn2–O16  | 78.0(1)  | O3–Mn3–O18                | 90.7(1)  |
| O6–Mn1–O11 <sup>#2</sup>                 | 141.0(1) | O2–Mn2–O17  | 79.9(1)  | O3–Mn3–O19                | 85.8(1)  |
| O6–Mn1–O12 <sup>#2</sup>                 | 85.7(1)  | O2–Mn2–N2   | 162.9(1) | O3–Mn3–O20                | 101.2(1) |
| O6–Mn1–O13                               | 86.2(1)  | O7–Mn2–O12  | 133.4(1) | O3–Mn3–O21                | 97.0(1)  |
| O6–Mn1–O14                               | 90.8(1)  | O7–Mn2–O15  | 80.7(1)  | O5 <sup>#1</sup> –Mn3–O18 | 79.5(1)  |
| O6–Mn1–N1                                | 71.1(1)  | O7–Mn2–O16  | 155.4(1) | O5 <sup>#1</sup> –Mn3–O19 | 84.3(1)  |
| O11 <sup>#2</sup> –Mn1–O12 <sup>#2</sup> | 55.4(1)  | O7–Mn2–O17  | 95.1(1)  | O5 <sup>#1</sup> –Mn3–O20 | 90.8(1)  |
| O11 <sup>#2</sup> –Mn1–O13               | 86.0(1)  | O7–Mn2–N2   | 69.0(1)  | O5 <sup>#1</sup> –Mn3–O21 | 94.0(1)  |
| O11 <sup>#2</sup> –Mn1–O14               | 88.4(1)  | O12–Mn2–O15 | 114.2(1) | O18–Mn3–O19               | 100.9(1) |
| O11 <sup>#2</sup> –Mn1–N1                | 147.9(1) | O12–Mn2–O16 | 65.0(1)  | O18–Mn3–O20               | 164.4(1) |
| O12 <sup>#2</sup> –Mn1–O13               | 78.6(1)  | O12–Mn2–O17 | 77.5(1)  | O18–Mn3–O21               | 84.3(1)  |
| O12 <sup>#2</sup> –Mn1–O14               | 88.5(1)  | O12–Mn2–N2  | 66.9(1)  | O19–Mn3–O20               | 90.1(1)  |
| O12 <sup>#2</sup> –Mn1–N1                | 156.8(1) | O15–Mn2–O16 | 75.9(1)  | O19–Mn3–O21               | 174.2(1) |
| O13–Mn1–O14                              | 167.0(1) | O15–Mn2–O17 | 167.2(1) | O20–Mn3–O21               | 84.4(1)  |

Symmetry transformations used to generate equivalent atoms: #1 =  $x-1/2, -y+1/2, z-1/2$ ; #2 =  $x+1/2, -y+1/2, z+1/2$

**Table S1b.** Selected hydrogen bond for **1<sup>a</sup>**

| D–H...A                      | d(D–H) | d(H...A) | ∠DHA | d(D...A) |
|------------------------------|--------|----------|------|----------|
| O13–H13A...O8 <sup>#3</sup>  | 0.85   | 1.91     | 154  | 2.699    |
| O13–H13B...O4 <sup>#4</sup>  | 0.74   | 2.18     | 158  | 2.878    |
| O14–H14A...O9 <sup>#5</sup>  | 0.82   | 1.95     | 171  | 2.756    |
| O14–H14B...O3 <sup>#6</sup>  | 0.76   | 2.24     | 163  | 2.977    |
| O15–H15A...O9 <sup>#5</sup>  | 0.81   | 2.00     | 167  | 2.796    |
| O15–H15B...O5 <sup>#7</sup>  | 0.86   | 2.08     | 150  | 2.860    |
| O16–H16A...O12               | 0.82   | 2.15     | 115  | 2.604    |
| O16–H16A...O13 <sup>#1</sup> | 0.82   | 2.31     | 149  | 3.045    |
| O16–H16B...O10 <sup>#5</sup> | 0.85   | 1.93     | 166  | 2.754    |
| O17–H17A...O10 <sup>#3</sup> | 0.86   | 2.09     | 153  | 2.879    |
| O17–H17B...O4 <sup>#8</sup>  | 0.82   | 2.01     | 151  | 2.753    |
| O18–H18A...O1 <sup>#9</sup>  | 0.77   | 2.14     | 152  | 2.842    |
| O18–H18B...O7 <sup>#9</sup>  | 0.81   | 2.06     | 163  | 2.843    |
| O19–H19A...O11 <sup>#3</sup> | 0.79   | 1.97     | 166  | 2.741    |
| O19–H19A...O1 <sup>#10</sup> | 0.79   | 2.59     | 118  | 3.039    |
| O19–H19B...O7 <sup>#10</sup> | 0.85   | 2.06     | 168  | 2.897    |
| O20–H20A...O6 <sup>#1</sup>  | 0.77   | 2.21     | 136  | 2.813    |
| O20–H20B...O10 <sup>#3</sup> | 0.78   | 2.08     | 167  | 2.842    |
| O21–H21A...O16               | 0.78   | 2.12     | 165  | 2.884    |
| O21–H21B...O8 <sup>#9</sup>  | 0.75   | 2.13     | 157  | 2.833    |

Symmetry transformations used to generate equivalent atoms: #1 =  $x-1/2, -y+1/2, z-1/2$ ; #2 =  $x+1/2, -y+1/2, z+1/2$ ; #3 =  $x, -y, z+1/2$ ; #4 =  $x+1/2, y-1/2, z$ ; #5 =  $x, -y+1, z+1/2$ ; #6 =  $x+1/2, y+1/2, z$ ; #7 =  $x, -y+1, z-1/2$ ; #8 =  $x, -y, z-1/2$ ; #9 =  $x-1/2, y+1/2, z$ ; #10 =  $x-1/2, y-1/2, z$

**Table S2.** Selected Interatomic Distances (Å) and Bond Angles (deg) for **2<sup>a</sup>**

|                                        |          |                                        |          |                                        |          |
|----------------------------------------|----------|----------------------------------------|----------|----------------------------------------|----------|
| Co1–O1                                 | 2.206(2) | Co1–N                                  | 2.017(2) | Co2–O4 <sup>#4</sup>                   | 2.012(2) |
| Co1–O1 <sup>#1</sup>                   | 2.206(2) | Co1–N <sup>#1</sup>                    | 2.017(2) | Co2–O5                                 | 2.124(2) |
| Co1–O6                                 | 2.103(2) | Co2–O1 <sup>#2</sup>                   | 2.186(2) | Co2–O7                                 | 2.158(2) |
| Co1–O6 <sup>#1</sup>                   | 2.103(2) | Co2–O3 <sup>#3</sup>                   | 2.083(2) | Co2–O7 <sup>#5</sup>                   | 2.188(2) |
| O1–Co1–O1 <sup>#1</sup>                | 101.5(1) | O6–Co1–O6 <sup>#1</sup>                | 84.8(1)  | O3 <sup>#3</sup> –Co2–O4 <sup>#4</sup> | 84.1(1)  |
| O1–Co1–O6                              | 152.0(1) | O6–Co1–N                               | 76.7(1)  | O3 <sup>#3</sup> –Co2–O5               | 94.3(1)  |
| O1–Co1–O6 <sup>#1</sup>                | 93.0(1)  | O6–Co1–N <sup>#1</sup>                 | 95.5(1)  | O3 <sup>#3</sup> –Co2–O7               | 92.1(1)  |
| O1–Co1–N                               | 75.7(1)  | O6 <sup>#1</sup> –Co1–N                | 95.5(1)  | O3 <sup>#3</sup> –Co2–O7 <sup>#5</sup> | 90.0(1)  |
| O1–Co1–N <sup>#1</sup>                 | 111.2(1) | O6 <sup>#1</sup> –Co1–N <sup>#1</sup>  | 76.7(1)  | O4 <sup>#4</sup> –Co2–O5               | 89.4(1)  |
| O1 <sup>#1</sup> –Co1–O6               | 93.0(1)  | O1 <sup>#2</sup> –Co2–O3 <sup>#3</sup> | 173.0(1) | O4 <sup>#4</sup> –Co2–O7               | 176.1(1) |
| O1 <sup>#1</sup> –Co1–O6 <sup>#1</sup> | 152.0(1) | O1 <sup>#2</sup> –Co2–O4 <sup>#4</sup> | 93.5(1)  | O4 <sup>#4</sup> –Co2–O7 <sup>#5</sup> | 91.0(1)  |
| O1 <sup>#1</sup> –Co1–N                | 111.2(1) | O1 <sup>#2</sup> –Co2–O5               | 92.2(1)  | O5–Co2–O7                              | 89.9(1)  |
| O1 <sup>#1</sup> –Co1–N <sup>#1</sup>  | 75.7(1)  | O1 <sup>#2</sup> –Co2–O7               | 90.4(1)  | O5–Co2–O7 <sup>#5</sup>                | 94.3(1)  |
| O1–Co1–O6                              | 101.5(1) | O1 <sup>#2</sup> –Co2–O7 <sup>#5</sup> | 83.5(1)  | O7–Co2–O7 <sup>#5</sup>                | 90.0(1)  |
| Hydrogen bonding contacts              |          |                                        |          |                                        |          |
| D–H...A                                | d(D–H)   | d(H...A)                               | ∠DHA     | d(D...A)                               |          |
| O7–H7A...O2 <sup>#2</sup>              | 0.80     | 1.89                                   | 157      | 2.643                                  |          |
| O7–H7B...O6                            | 0.83     | 1.83                                   | 150      | 2.575                                  |          |

Symmetry transformations used to generate equivalent atoms: #1 =  $-x, y, -z+3/2$ ; #2 =  $-x, y+1, -z+3/2$ ; #3 =  $x-1/2, -y+3/2, -z+2$ ; #4 =  $-x, -y+2, -z+2$ ; #5 =  $-x-1/2, y+1/2, z$ ; #6 =  $-x, y-1, -z+3/2$ ; #7 =  $x+1/2, -y+3/2, -z+2$ ; #8 =  $-x-1/2, y-1/2, z$

**Table S3.** Selected Interatomic Distances (Å) and Bond Angles (deg) for **3<sup>a</sup>**

|                                        |          |                          |          |                                        |          |
|----------------------------------------|----------|--------------------------|----------|----------------------------------------|----------|
| Co1–O1                                 | 2.104(2) | Co1–O7                   | 2.152(3) | Co2–O9                                 | 2.140(2) |
| Co1–O3 <sup>#1</sup>                   | 2.329(2) | Co1–N1                   | 2.049(2) | Co2–O9 <sup>#5</sup>                   | 2.140(2) |
| Co1–O3 <sup>#2</sup>                   | 2.046(2) | Co2–O8                   | 2.060(2) | Co2–ON                                 | 2.130(1) |
| Co1–O6                                 | 2.113(2) | Co2–O8 <sup>#5</sup>     | 2.060(2) | Co2–ON <sup>#5</sup>                   | 2.130(1) |
| O1–Co1–O3 <sup>#1</sup>                | 84.3(1)  | O3 <sup>#2</sup> –Co1–O7 | 93.9(1)  | O8 <sup>#5</sup> –Co2–O9               | 90.3(1)  |
| O1–Co1–O3 <sup>#2</sup>                | 105.3(1) | O3 <sup>#2</sup> –Co1–N1 | 178.4(1) | O8 <sup>#5</sup> –Co2–O9 <sup>#5</sup> | 89.7(1)  |
| O1–Co1–O6                              | 149.4(1) | O6–Co1–O7                | 97.4(1)  | O8 <sup>#5</sup> –Co2–N2               | 89.0(1)  |
| O1–Co1–O7                              | 90.5(1)  | O6–Co1–N1                | 75.1(1)  | O8 <sup>#5</sup> –Co2–N2 <sup>#5</sup> | 91.0(1)  |
| O1–Co1–N1                              | 75.7(1)  | O7–Co1–N1                | 87.3(1)  | O9–Co2–O9 <sup>#5</sup>                | 180.0(1) |
| O3 <sup>#1</sup> –Co1–O3 <sup>#2</sup> | 77.9(1)  | O8–Co2–O8 <sup>#5</sup>  | 180.0    | O9–Co2–N2                              | 90.8(1)  |
| O3 <sup>#1</sup> –Co1–O6               | 92.1(1)  | O8–Co2–O9                | 89.7(1)  | O9–Co2–N2 <sup>#5</sup>                | 89.2(1)  |
| O3 <sup>#1</sup> –Co1–O7               | 168.7(1) | O8–Co2–O9 <sup>#5</sup>  | 90.3(1)  | O9 <sup>#5</sup> –Co2–N2               | 89.2(1)  |
| O3 <sup>#1</sup> –Co1–N1               | 101.1(1) | O8–Co2–N2                | 91.0(1)  | O9 <sup>#5</sup> –Co2–N2 <sup>#5</sup> | 90.8(1)  |
| O3 <sup>#2</sup> –Co1–O6               | 103.6(1) | O8–Co2–N2 <sup>#5</sup>  | 89.0(1)  | N2–Co2–N2 <sup>#5</sup>                | 180.0(1) |
| Hydrogen bonding contacts              |          |                          |          |                                        |          |
| D–H...A                                | d(D–H)   | d(H...A)                 | ∠DHA     | d(D...A)                               |          |
| O7–H7A...O4 <sup>#8</sup>              | 0.85     | 2.03                     | 166      | 2.865                                  |          |
| O7–H7B...O3 <sup>#2</sup>              | 0.86     | 2.21                     | 180      | 3.069                                  |          |
| O7–H7B...O4 <sup>#2</sup>              | 0.86     | 2.36                     | 122      | 2.902                                  |          |
| O8–H8A...O6 <sup>#8</sup>              | 0.85     | 1.83                     | 172      | 2.671                                  |          |
| O8–H8B...O1 <sup>#9</sup>              | 0.85     | 1.85                     | 168      | 2.681                                  |          |
| O9–H9C...O5 <sup>#10</sup>             | 0.85     | 1.94                     | 173      | 2.780                                  |          |
| O9–H9B...O2 <sup>#9</sup>              | 0.85     | 1.96                     | 172      | 2.800                                  |          |

Symmetry transformations used to generate equivalent atoms: #1 =  $-x+2, -y+1, -z+2$ ; #2 =  $x, y+1, z$ ; #3 =  $x, y-1, z$ ; #4 =  $-x+2, -y+2, -z+2$ ; #5 =  $-x+1, -y, -z+1$ ; #6 =  $-x, -y+1, -z+1$ ; #7 =  $x-1, y+1, z$ ; #8 =  $-x+1, -y+1, -z+2$ ; #9 =  $x-1, y-1, z$ ; #10 =  $x, y-1, z-1$

**Figure S1.** I.R spectra of (a) **1**, (b) **2** and (c) **3**.

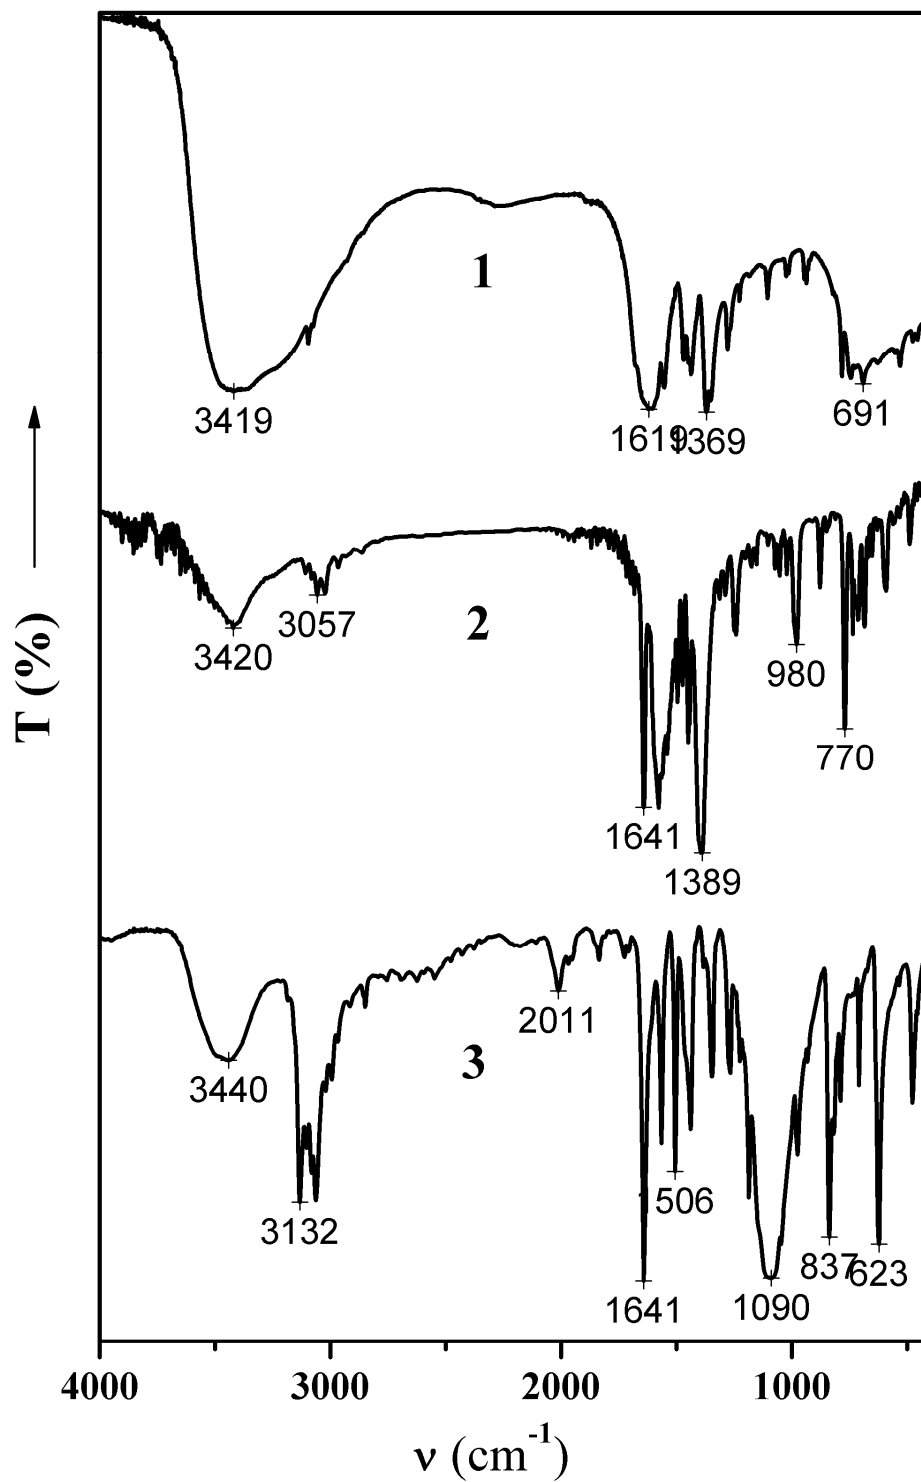

Figure S2. DTA-TG curves for (a) **1**, (b) **2** and (c) **3**.

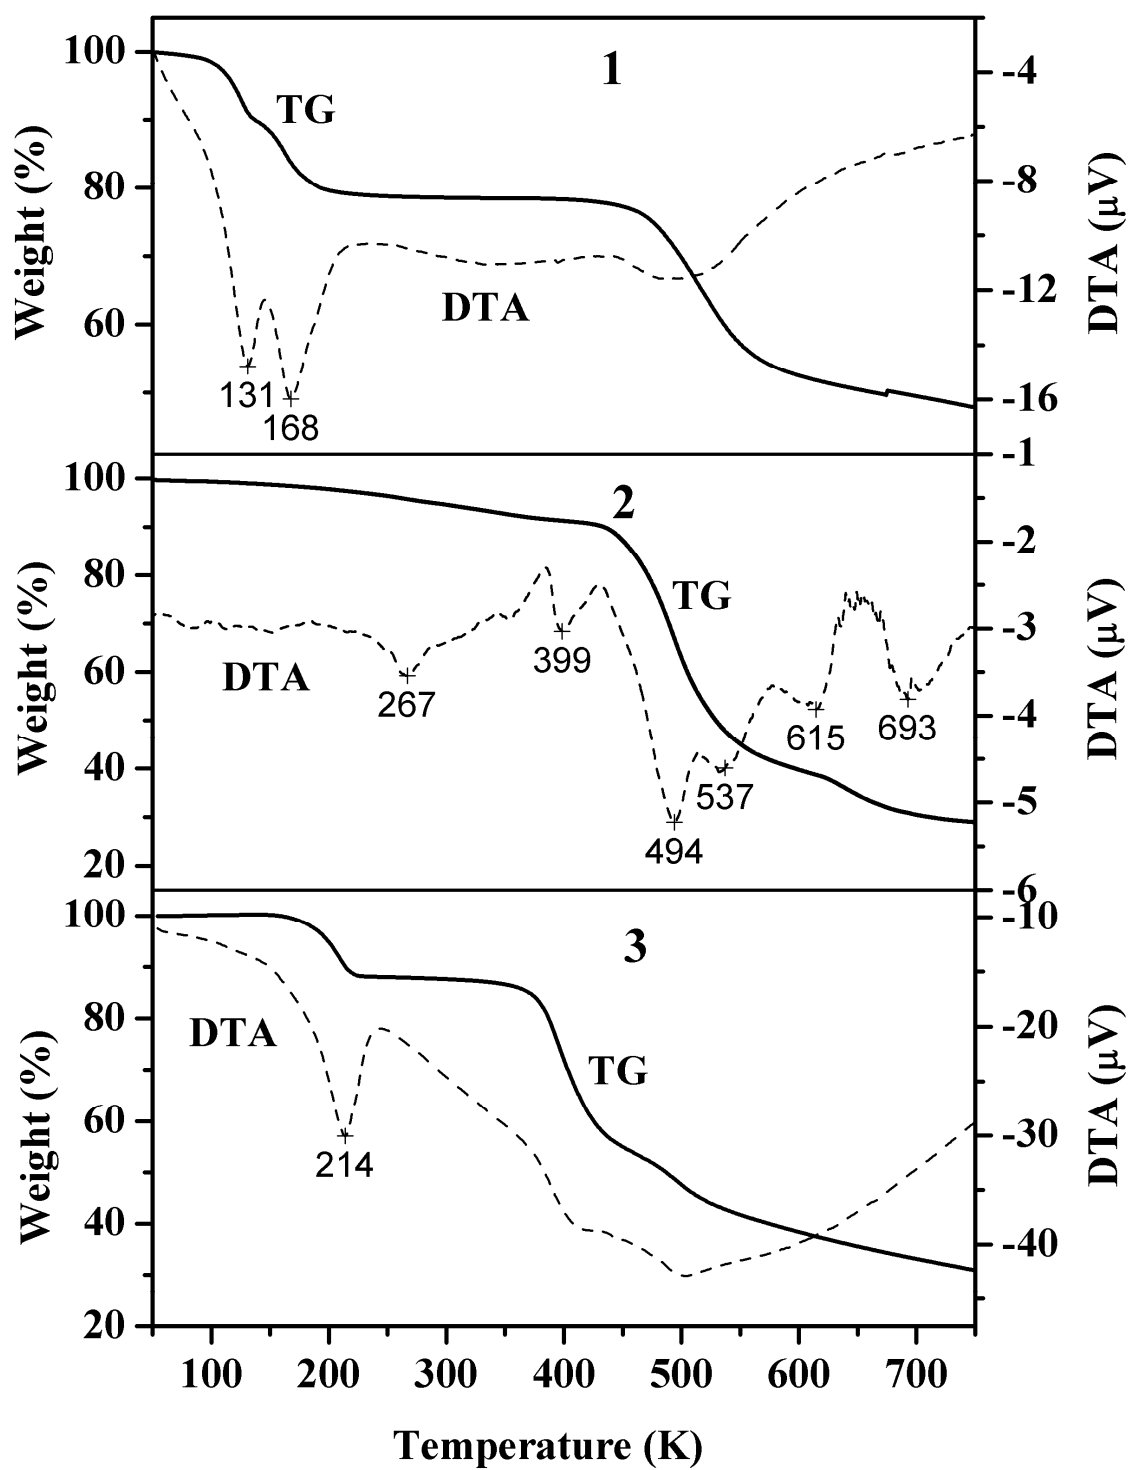



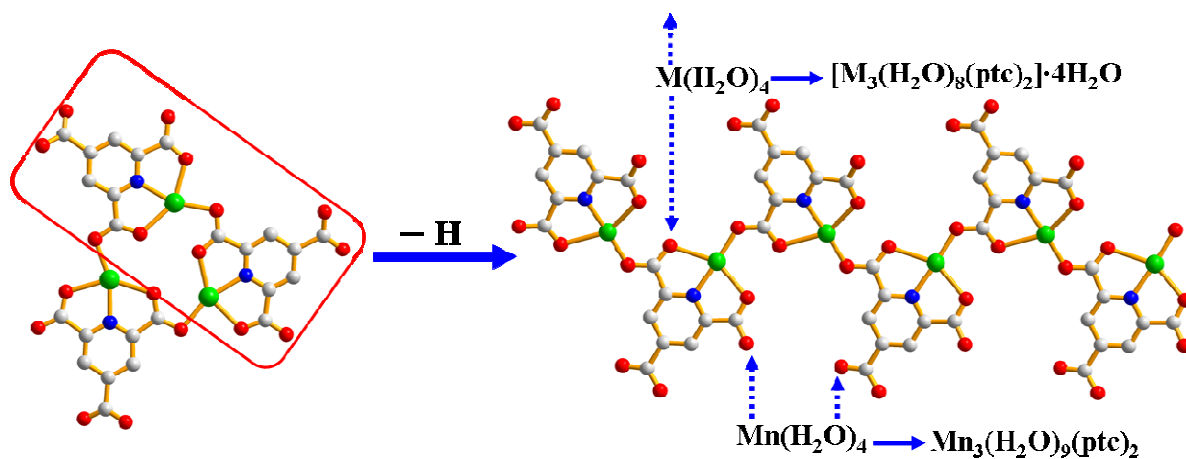

Figure S3a. Assembly of crystal structures from the transition metal-ptc compounds and **1**.

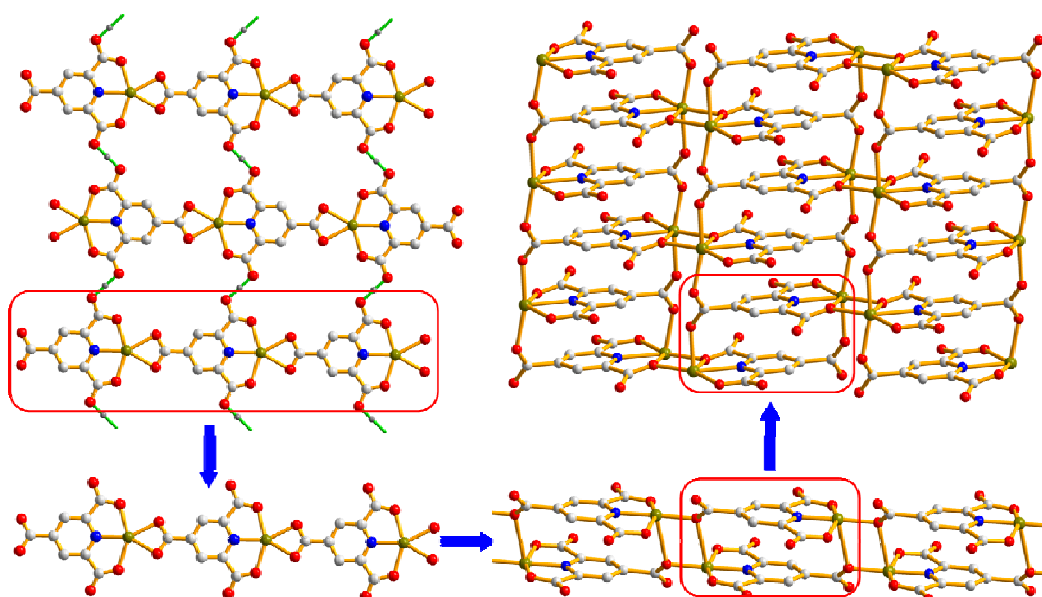

Figure S3b. The evolving of crystal structures for the transition metal-ptc compounds.

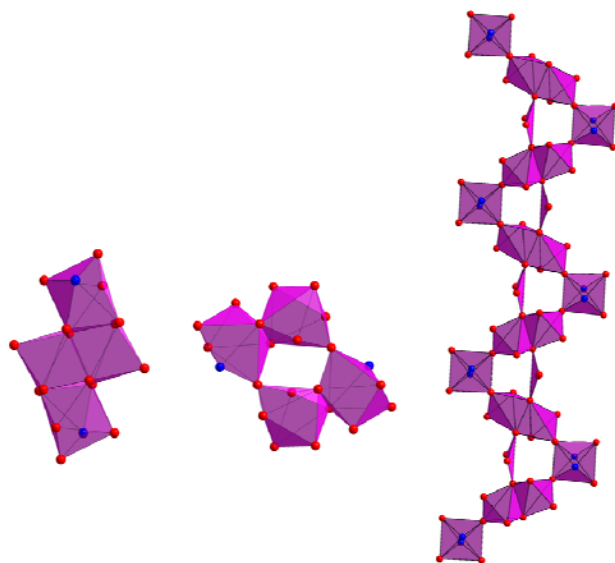

Figure S3c. The metal oxide unit in the transition metal hydroxo ptc complexes.
